# Supplementary material for: Graphene oxide/titania hybrid films with dual-UV-responsive surfaces of tunable wettability
Source: Royal Society of Chemistry journal article supplement (doi:10.1039/c2ra21699j), 2012-01-01
Supplement: c2ra21699j.pdf [file c2ra21699j.pdf]

## Supplementary Information

### Graphene oxide/titania hybrid films with dual-UV-responsive surfaces of tunable wettability

Pengzhan Sun<sup>1</sup>, Miao Zhu<sup>1</sup>, Renzhi Ma<sup>2</sup>, Kunlin Wang<sup>1</sup>, Jinqun Wei<sup>1</sup>, Dehai Wu<sup>1</sup>, Takayoshi Sasaki<sup>2</sup>, Hongwei Zhu<sup>1,2</sup>

<sup>1</sup>Department of Mechanical Engineering, Key Laboratory for Advanced Manufacturing by Materials Processing Technology, Tsinghua University, Beijing 100084, China

<sup>2</sup>International Center for Materials Nanoarchitectonics, National Institute for Materials Science Tsukuba, Ibaraki 305-0044, Japan

<sup>3</sup>Center for Nano and Micro Mechanics (CNMM), Tsinghua University, Beijing 100084, China

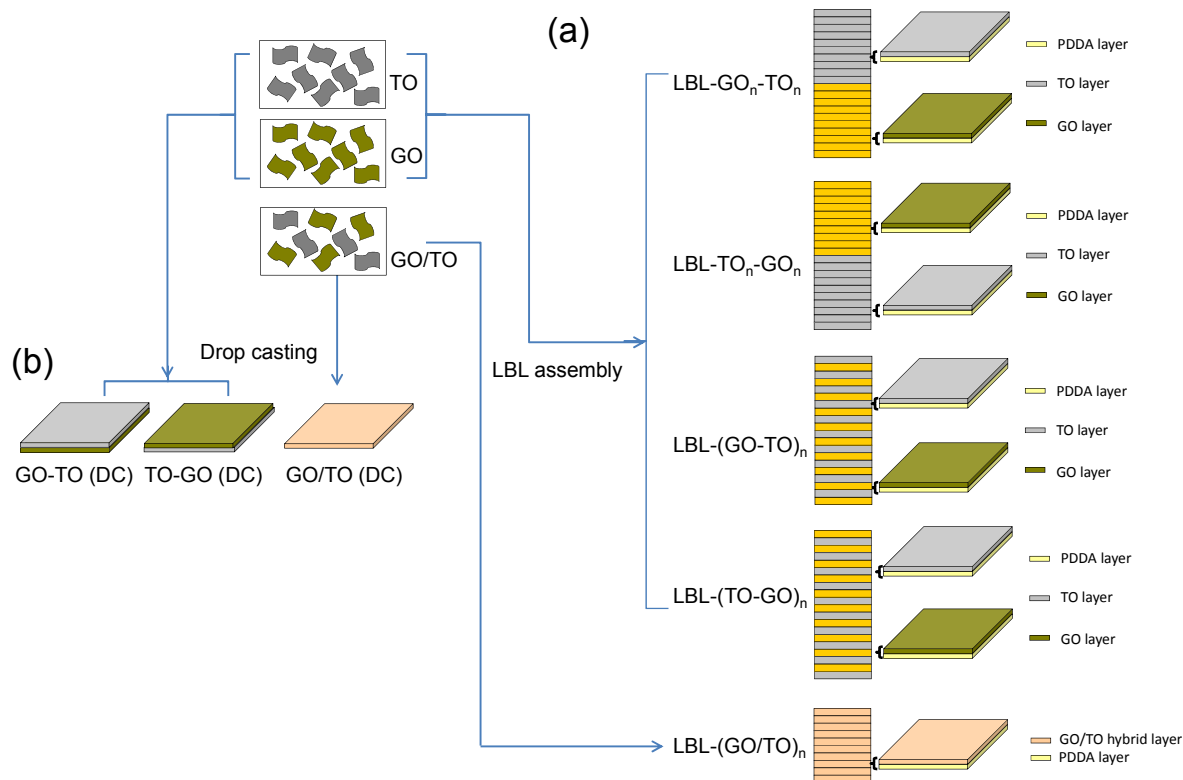

**Figure S1** Schematics for the fabrication of hybrid films of GO and TO. (a) LBL and (b) DC.

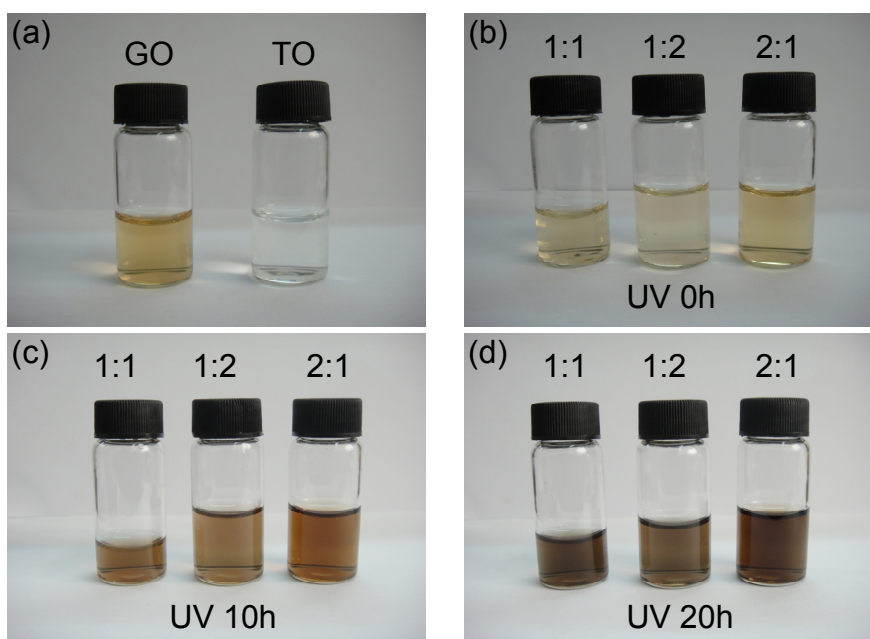

**Figure S2** Photographs of (a) GO colloidal suspension (0.1mg/mL) and TO colloidal suspension (0.08mg/mL) and their hybrid colloidal suspensions with volume ratios of 1:1, 1:2, and 2:1 (from left to right) after UV irradiation for (b) 0h, (c) 10h and (d) 20h.

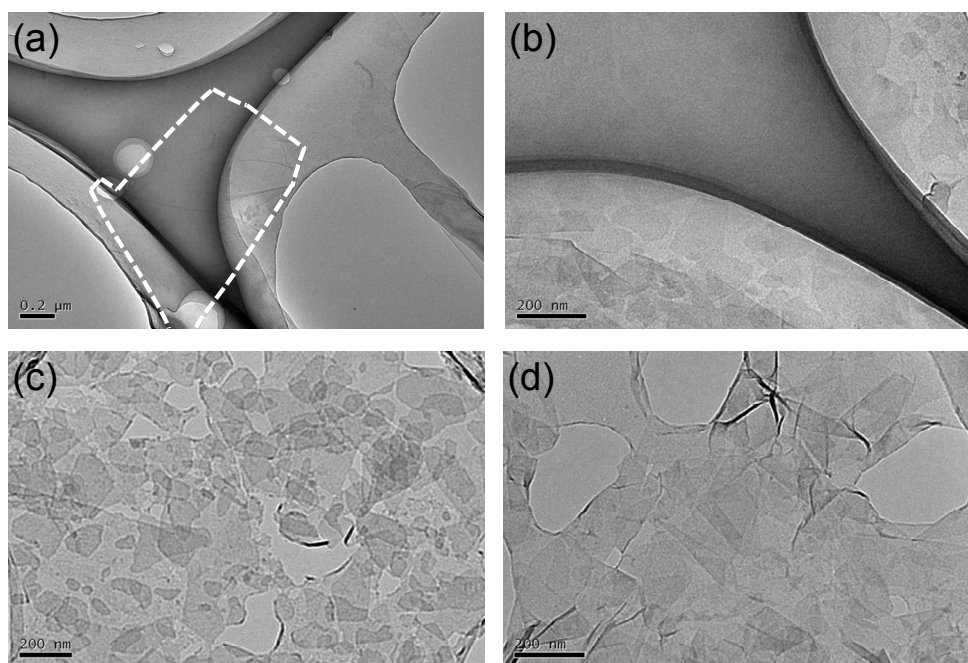

**Figure S3** TEM images of (a) GO nanosheets, (b) TO nanosheets, (c) GO-TO film and (d) GO/TO hybrid film fabricated by LBL.

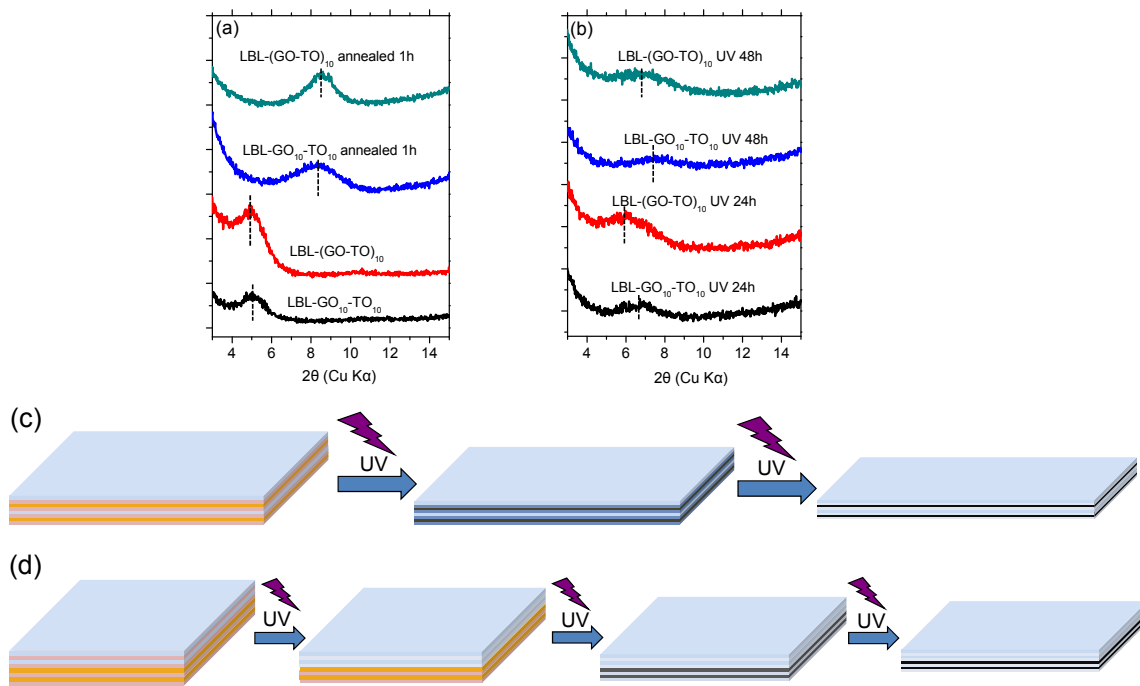

**Figure S4** XRD patterns of (a) as-prepared samples of  $GO_n-TO_n$  and  $(GO-TO)_n$  as well as the samples after annealing at  $300^\circ\text{C}$  in air for 1h, (b)  $GO_n-TO_n$  and  $(GO-TO)_n$  after UV irradiation for 24h and 48h. Mechanism schematics of UV assisted PDDA decomposition and GO reduction of (c)  $(GO-TO)_n$  and (d)  $GO_n-TO_n$ .

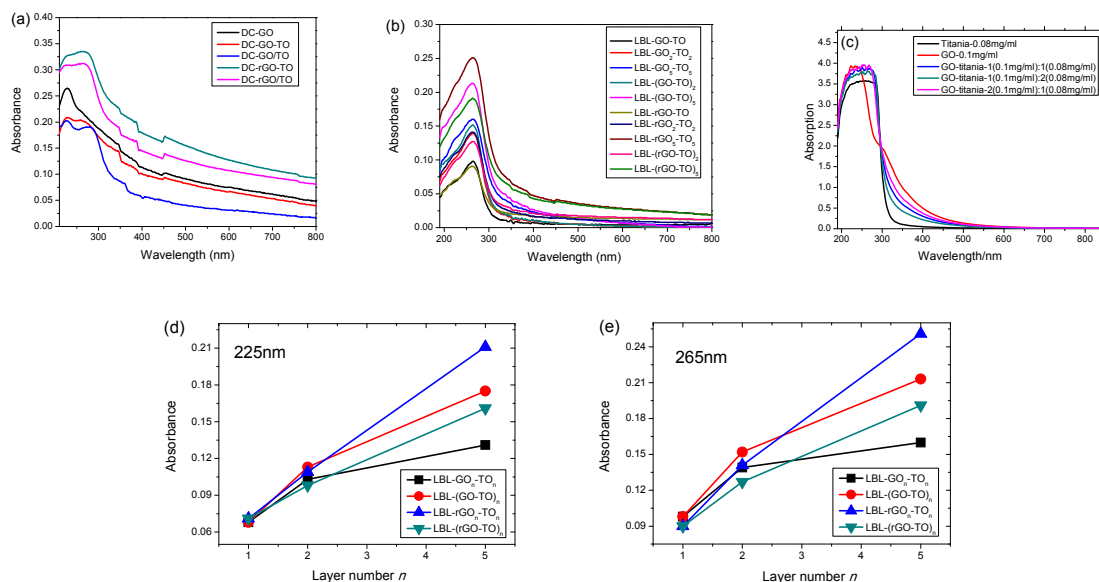

**Figure S5** (a) UV-vis absorption spectra of as-prepared samples as well as the samples after UV for 48h fabricated by drop-casting. (b) UV-vis absorption spectra of as-prepared samples as well as the samples after UV irradiation for 48h fabricated by LBL. (c) UV-vis absorption spectra of GO, TO as well as hybrid colloidal suspensions with different ratios. (d) UV-vis absorption peaks located at 265nm and  $\epsilon$  the shoulders located at 225nm for different structures of the LBL samples. (e) UV-vis absorption peaks located at 265nm and  $\epsilon$  the shoulders located at 225nm for different structures of the LBL samples.

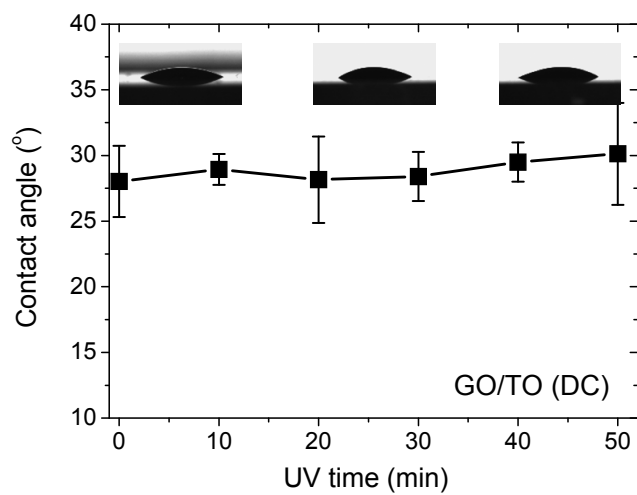

**Figure S6** GO/TO hybrid film by drop-casting using GO/TO colloidal suspension [1(0.2mg/mL) :1(0.16mg/mL)] as the source.
